# Supplementary material
Source: publisher figshare collection journal article supplement (https://acs.figshare.com/ndownloader/files/3776743)
Supplement: Supplementary file 1 [file 3776743]

# SUPPORTING INFORMATION

## Activation Parameters for Additions to Alkenes of Arylchlorocarbenes with Enhanced Electrophilicity

Lei Wang, Karsten Krogh-Jespersen, and Robert A. Moss\*

*Department of Chemistry and Chemical Biology, Rutgers University,  
The State University of New Jersey, New Brunswick, New Jersey 08903*

| Contents                                                                                            | Page        |
|-----------------------------------------------------------------------------------------------------|-------------|
| 1. Phenylchlorocarbene (PhCCl)                                                                      | S-2 – S-5   |
| 2. Pentafluorophenylchlorocarbene (F <sub>5</sub> -PhCCl)                                           | S-6 – S-10  |
| 3. 3,5-Dinitrophenylchlorocarbene (3,5-DN-PhCCl)                                                    | S-11 – S-14 |
| 4. NMR Spectra                                                                                      | S-15 – S-17 |
| 5. Optimized geometries and absolute energies for<br>PhCCl, F <sub>5</sub> -PhCCl, and 3,5-DN-PhCCl | S-18 – S-22 |

# 1. Phenylchlorocarbene (PhCCl)

## Additions to TME

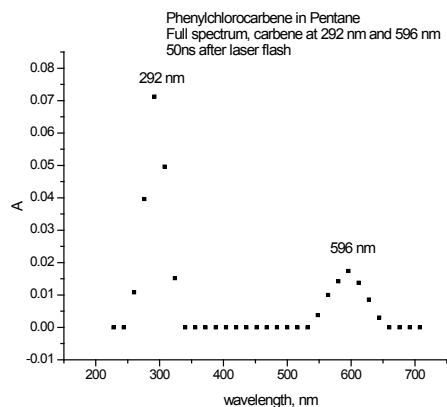

**Figure S-1.** LFP UV-vis spectrum of phenylchlorocarbene in pentane; carbene absorptions at 292 nm and 596 nm.

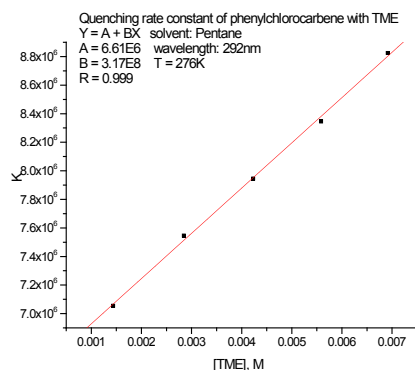

**Figure S-2.** Rate constant for addition of PhCCl to TME at 276 K:  $k = 3.17 \exp 8 \text{ M}^{-1} \text{ s}^{-1}$ ,  $r = 0.999$ .

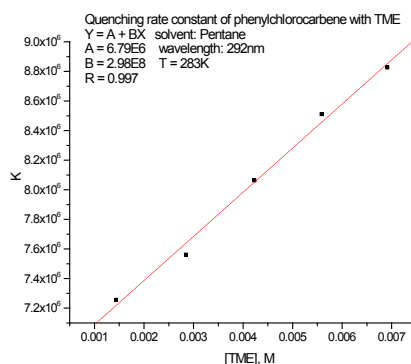

**Figure S-3.** Rate constant for addition of PhCCl to TME at 283 K:  $k = 2.98 \exp 8 \text{ M}^{-1} \text{ s}^{-1}$ ,  $r = 0.997$ .

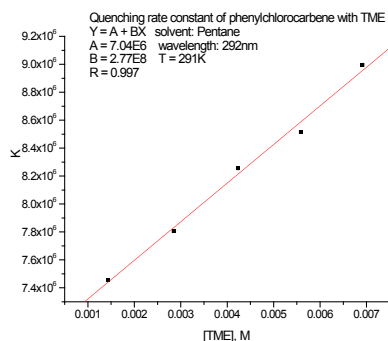

**Figure S-4.** Rate constant for addition of PhCCl to TME at 291 K:  $k = 2.77 \exp 8 \text{ M}^{-1} \text{ s}^{-1}$ ,  $r = 0.997$ .

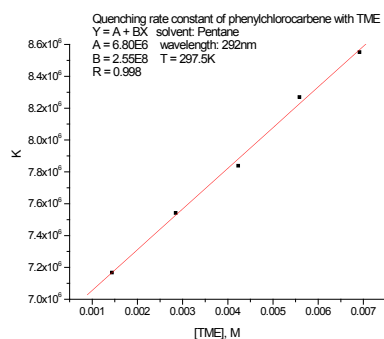

**Figure S-5.** Rate constant for addition of PhCCl to TME at 297.5 K:  $k = 2.55 \exp 8 \text{ M}^{-1} \text{ s}^{-1}$ ,  $r = 0.998$ .

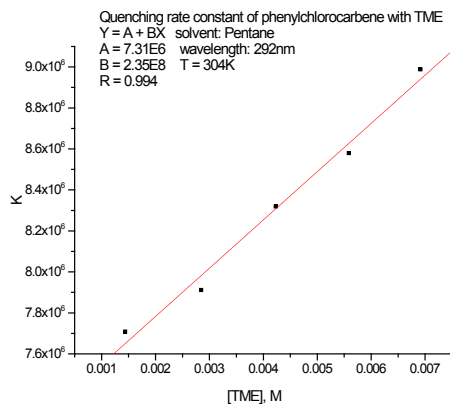

**Figure S-6.** Rate constant for addition of PhCCl to TME at 304 K:  $k = 2.35 \times 10^8 \text{ M}^{-1} \text{ s}^{-1}$ ,  $r = 0.994$ .

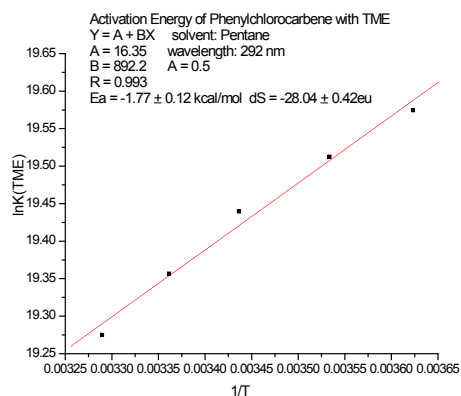

**Figure S-7.** Activation energy for addition of PhCCl to TME:  $E_a = -1.77 \pm 0.12 \text{ kcal/mol}$ ,  $\log A = 7.1 \text{ s}^{-1}$ ,  $\Delta S^\ddagger = -28.0 \pm 0.4 \text{ e.u.}$ ,  $r = 0.993$ .

### Additions to cyclohexene

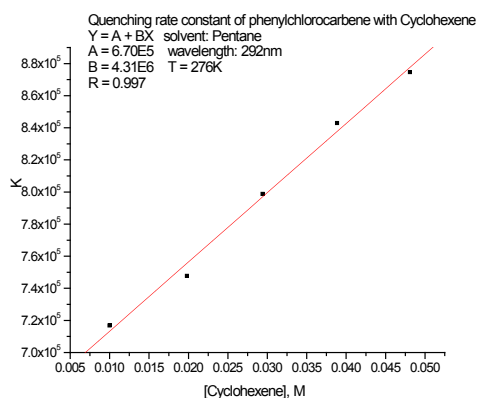

**Figure S-8.** Rate constant for addition of PhCCl to cyclohexene at 276 K:  $k = 4.31 \times 10^6 \text{ M}^{-1} \text{ s}^{-1}$ ,  $r = 0.997$ .

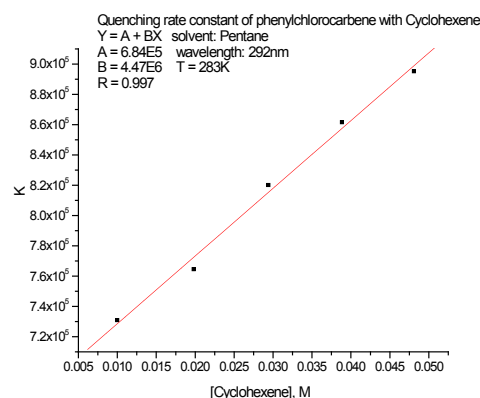

**Figure S-9.** Rate constant for addition of PhCCl to cyclohexene at 283 K:  $k = 4.47 \times 10^6 \text{ M}^{-1} \text{ s}^{-1}$ ,  $r = 0.997$ .

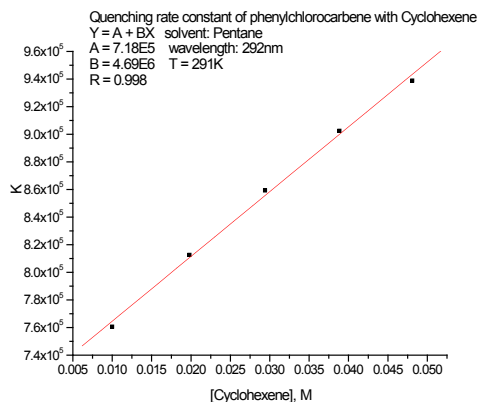

**Figure S-10.** Rate constant for addition of PhCCl to cyclohexene at 291 K:  $k = 4.69 \times 10^6 \text{ M}^{-1} \text{ s}^{-1}$ ,  $r = 0.998$ .

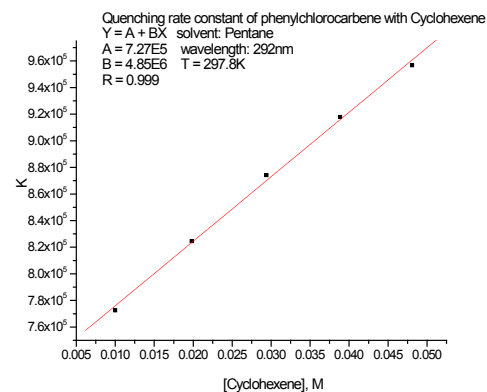

**Figure S-11.** Rate constant for addition of PhCCl to cyclohexene at 298 K:  $k = 4.85 \times 10^6 \text{ M}^{-1} \text{ s}^{-1}$ ,

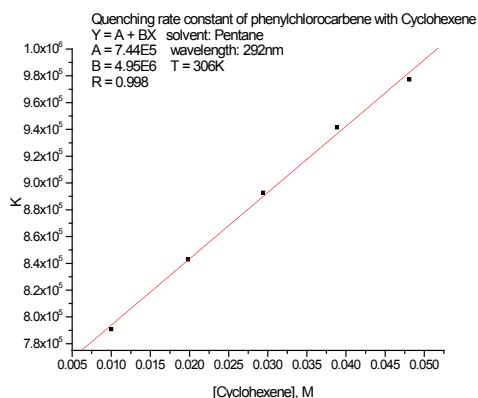

**Figure S-12.** Rate constant for addition of PhCCl to cyclohexene at 306 K:  $k = 4.95 \exp 6 \text{ M}^{-1} \text{ s}^{-1}$ ,  $r = 0.998$

*Additions to 1-hexene*

$$r = 0.999.$$

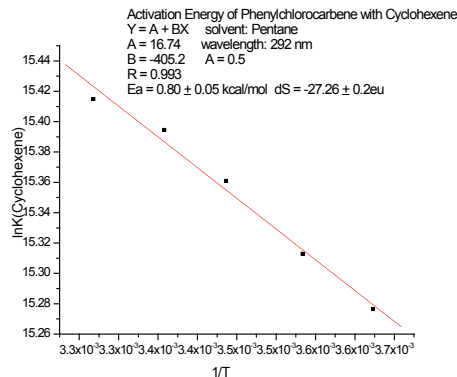

**Figure S-13.** Activation energy for addition of PhCCl to cyclohexene:  $E_a = -0.80 \pm 0.05 \text{ kcal/mol}$ ,  $\log A = 7.3 \text{ s}^{-1}$ ,  $\Delta S^\ddagger = -27.3 \pm 0.2 \text{ e.u.}$ ,  $r = 0.993$ .

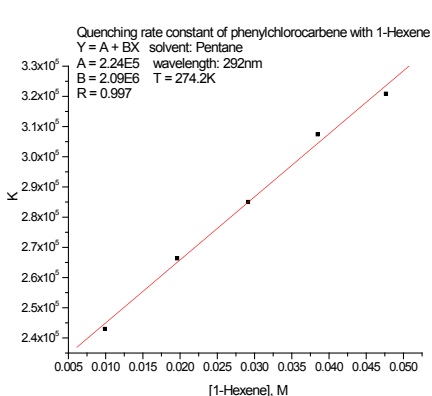

**Figure S-14.** Rate constant for addition of PhCCl to 1-hexene at 274 K:  $k = 2.09 \exp 6 \text{ M}^{-1} \text{ s}^{-1}$ ,  $r = 0.997$ .

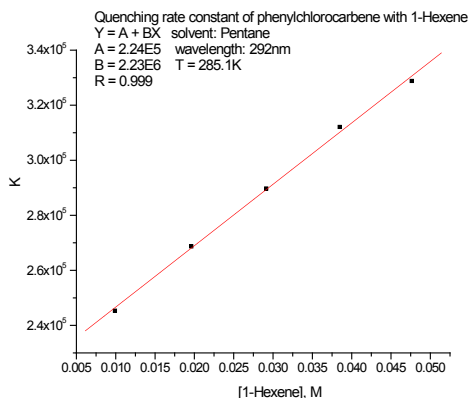

**Figure S-15.** Rate constant for addition of PhCCl to 1-hexene at 285 K:  $k = 2.23 \exp 6 \text{ M}^{-1} \text{ s}^{-1}$ ,  $r = 0.999$ .

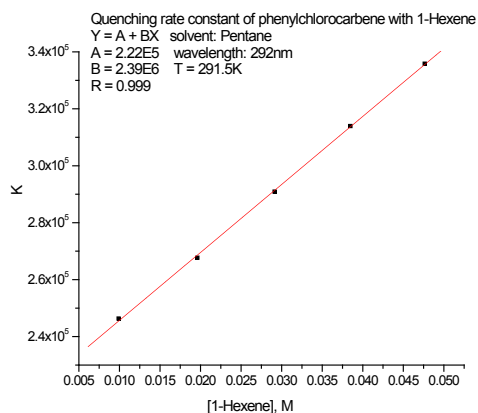

**Figure S-16.** Rate constant for addition of PhCCl to 1-hexene at 291.5 K:  $k = 2.39 \exp 6 \text{ M}^{-1} \text{ s}^{-1}$ ,  $r = 0.999$ .

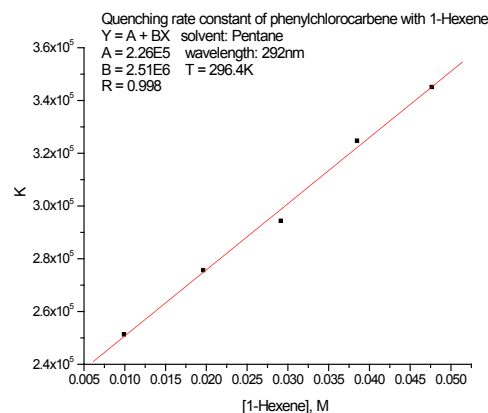

**Figure S-17.** Rate constant for addition of PhCCl to 1-hexene at 296 K:  $k = 2.51 \exp 6 \text{ M}^{-1} \text{ s}^{-1}$ ,  $r = 0.998$ .

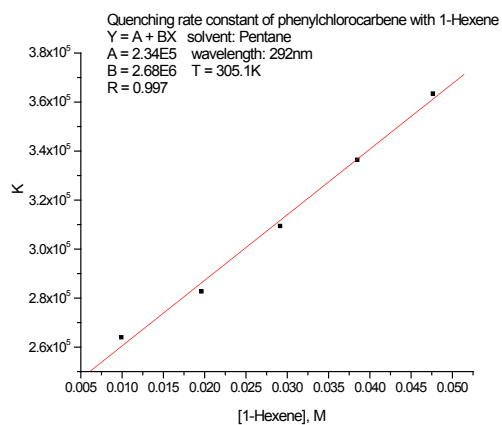

**Figure S-18.** Rate constant for addition of PhCCl to 1-hexene at 305 K:  $k = 2.68 \exp 6 M^{-1} s^{-1}$ ,  $r = 0.997$ .

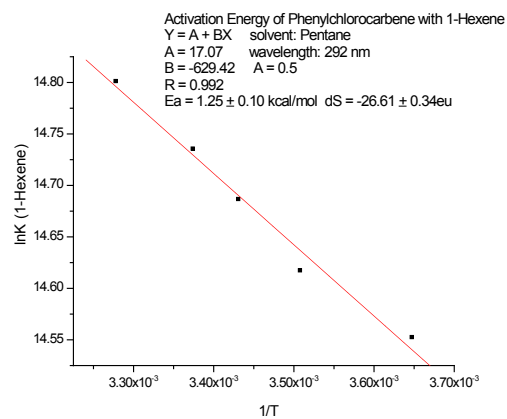

**Figure S-19.** Activation energy for addition of PhCCl to 1-hexene:  $E_a = 1.25 \pm 0.10 \text{ kcal/mol}$ ,  $\log A = 7.41 s^{-1}$ ,  $\Delta S^\ddagger = -26.6 \pm 0.3 \text{ e.u.}$ ,  $r = 0.992$ .

## 2. Pentafluorophenylchlorocarbene ( $F_5\text{-PhCCl}$ )

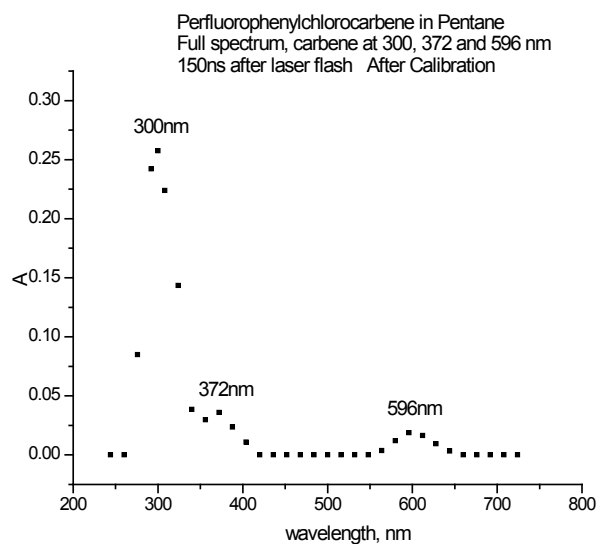

**Figure S-20.** Calibrated LFP UV-vis spectrum of pentafluorophenylchlorocarbene in pentane; carbene signals at 300 nm, 372 nm, and 596 nm.

## Additions to tetramethylethylene

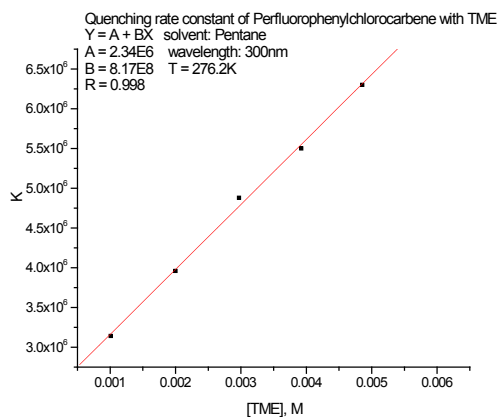

**Figure S-21.** Rate constant for addition of  $F_5$ -PhCCl to TME at 276 K:  $k = 8.17 \exp 8 \text{ M}^{-1} \text{ s}^{-1}$ ,  $r = 0.998$ .

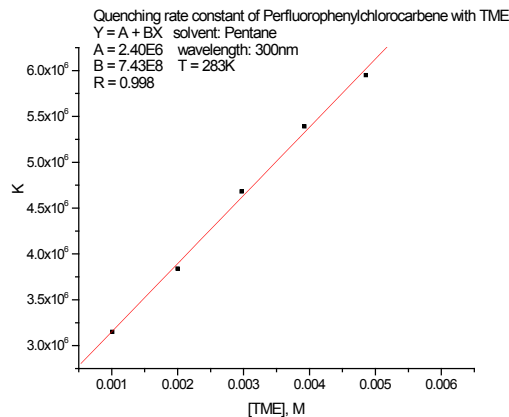

**Figure S-22.** Rate constant for addition of  $F_5$ -PhCCl to TME at 283 K:  $k = 7.43 \exp 8 \text{ M}^{-1} \text{ s}^{-1}$ ,  $r = 0.998$ .

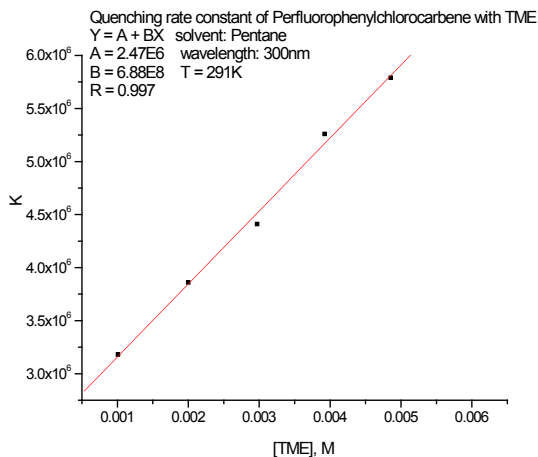

**Figure S-23.** Rate constant for addition of  $F_5$ -PhCCl to TME at 291 K:  $k = 6.88 \exp 8 \text{ M}^{-1} \text{ s}^{-1}$ ,  $r = 0.997$ .

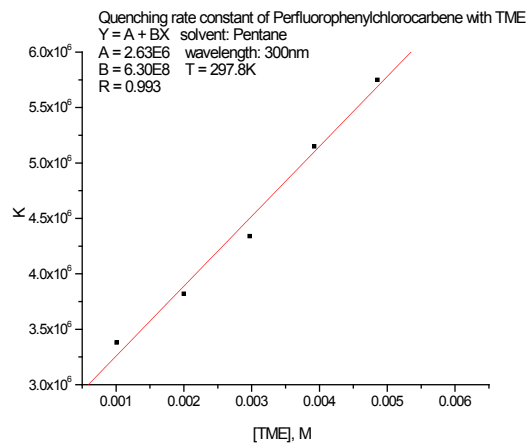

**Figure S-24.** Rate constant for addition of  $F_5$ -PhCCl to TME at 298 K:  $k = 6.30 \exp 8 \text{ M}^{-1} \text{ s}^{-1}$ ,  $r = 0.993$ .

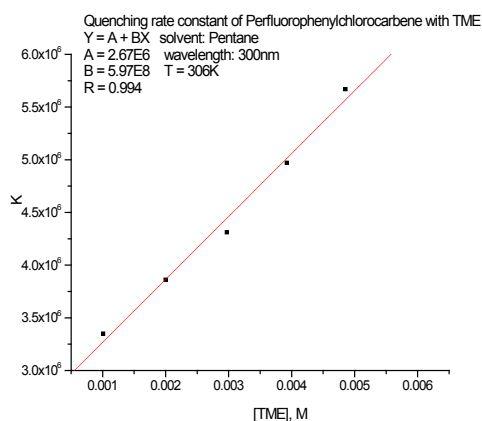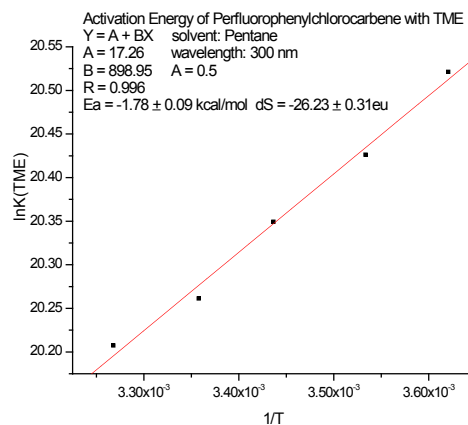

**Figure S-25.** Rate constant for addition of  $F_5\text{-PhCCl}$  to TME at 306 K:  $k = 5.97 \exp 8 \text{ M}^{-1} \text{ s}^{-1}$ ,  $r = 0.994$ . **Figure S-26.** Activation energy for addition of  $F_5\text{-PhCCl}$  to TME:  $E_a = -1.78 \pm 0.09 \text{ kcal/mol}$ ,  $\log A = 7.49 \text{ s}^{-1}$ ,  $\Delta S^\ddagger = -26 \pm 0.3 \text{ e.u.}$ ,  $r = 0.996$ .

### Additions to cyclohexene

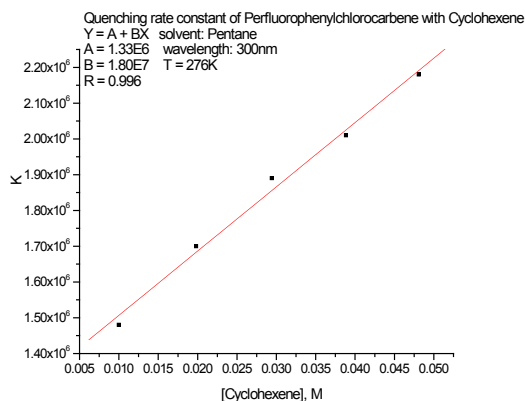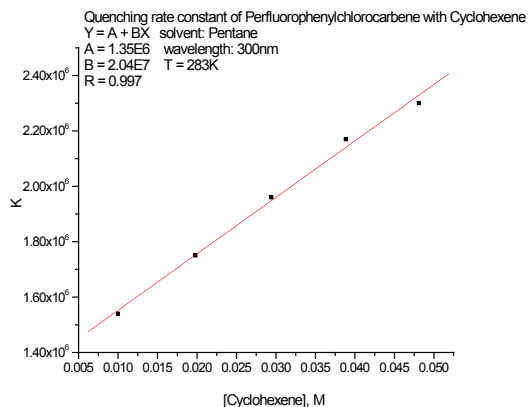

**Figure S-27.** Rate constant for addition of  $F_5\text{-PhCCl}$  to cyclohexene at 276 K:  $k = 1.80 \exp 7 \text{ M}^{-1} \text{ s}^{-1}$ ,  $r = 0.996$ . **Figure S-28.** Rate constant for addition of  $F_5\text{-PhCCl}$  to cyclohexene at 283 K:  $k = 2.04 \exp 7 \text{ M}^{-1} \text{ s}^{-1}$ ,  $r = 0.997$ .

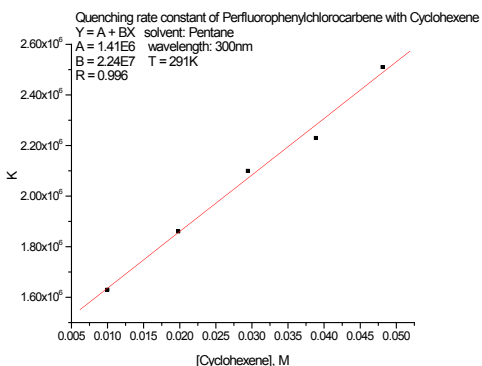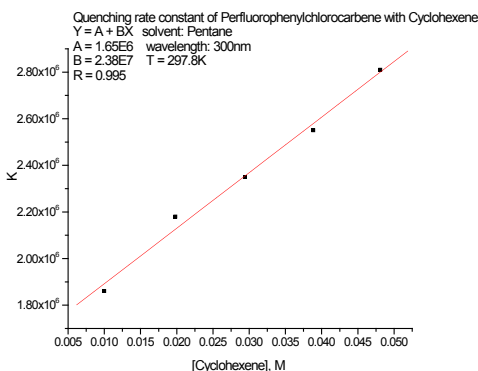

**Figure S-29.** Rate constant for addition of  $F_5\text{-PhCCl}$  to cyclohexene at 291 K:  $k = 2.24 \exp 7 \text{ M}^{-1} \text{ s}^{-1}$ ,  $r = 0.996$ . **Figure S-30.** Rate constant for addition of  $F_5\text{-PhCCl}$  to cyclohexene at 298 K:  $k = 2.38 \exp 7 \text{ M}^{-1} \text{ s}^{-1}$ ,  $r = 0.995$ .



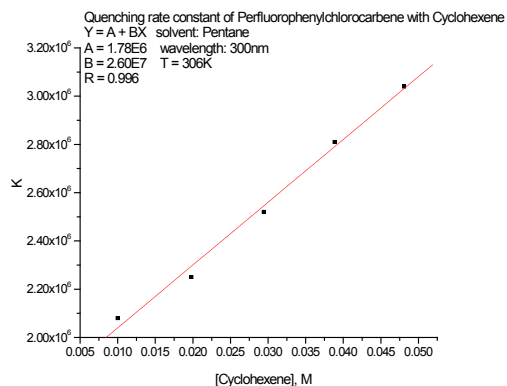

**Figure S-31.** Rate constant for addition of  $F_5$ -PhCCl to cyclohexene at 306 K:  $k = 2.60 \exp 7 M^{-1} s^{-1}$ ,  $r = 0.996$ .

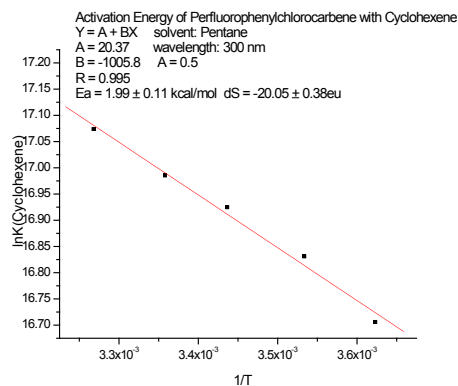

**Figure S-32.** Activation energy for addition of  $F_5$ -PhCCl to cyclohexene:  $E_a = 1.99 \pm 0.11 \text{ kcal/mol}$ ,  $\log A = 8.84 s^{-1}$ ,  $\Delta S^\ddagger = -20 \pm 0.4 \text{ e.u.}$ ,  $r = 0.995$ .

### Additions to 1-hexene

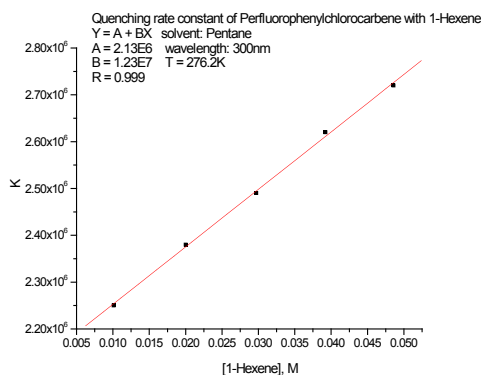

**Figure S-33.** Rate constant for addition of  $F_5$ -PhCCl to 1-hexene at 276 K:  $k = 1.23 \exp 7 M^{-1} s^{-1}$ ,  $r = 0.999$ .

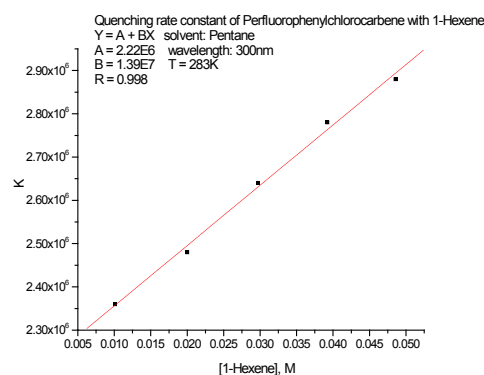

**Figure S-34.** Rate constant for addition of  $F_5$ -PhCCl to 1-hexene at 283 K:  $k = 1.39 \exp 7 M^{-1} s^{-1}$ ,  $r = 0.998$ .

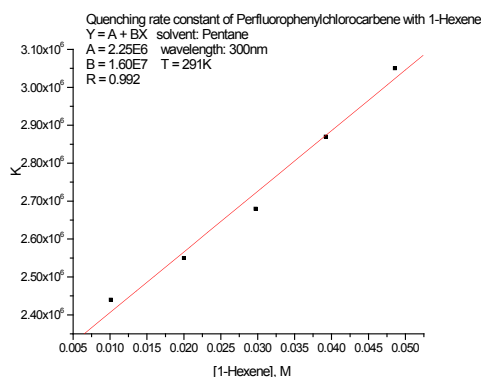

**Figure S-35.** Rate constant for addition of  $F_5$ -PhCCl to 1-hexene at 291 K:  $k = 1.60 \exp 7 M^{-1} s^{-1}$ ,  $r = 0.992$ .

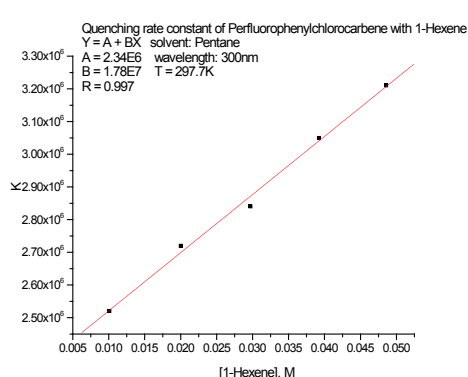

**Figure S-36.** Rate constant for addition of  $F_5$ -PhCCl to 1-hexene at 298 K:  $k = 1.78 \exp 7 M^{-1} s^{-1}$ ,  $r = 0.997$ .

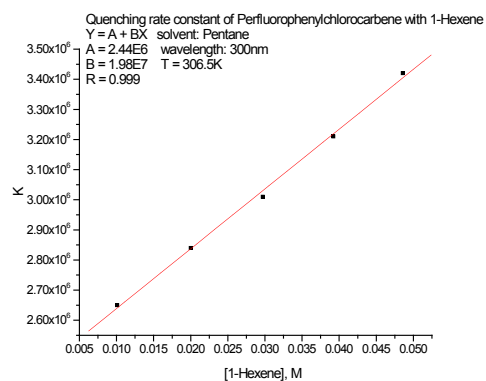

**Figure S-37.** Rate constant for addition of  $F_5\text{-PhCCl}$  to 1-hexene at 306.5 K:  $k = 1.98 \exp 7 \text{ M}^{-1} \text{ s}^{-1}$ ,  $r = 0.999$ .

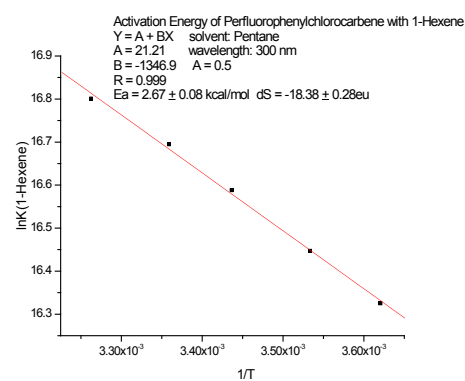

**Figure S-38.** Activation energy for addition of  $F_5\text{-PhCCl}$  to 1-hexene:  $E_a = 2.67 \pm 0.08 \text{ kcal/mol}$ ,  $\log A = 9.21 \text{ s}^{-1}$ ,  $\Delta S^\ddagger = -18 \pm 0.3 \text{ e.u.}$ ,  $r = 0.999$ .

### 3. 3,5-Dinitrophenylchlorocarbene (3,5-DN-PhCCl)

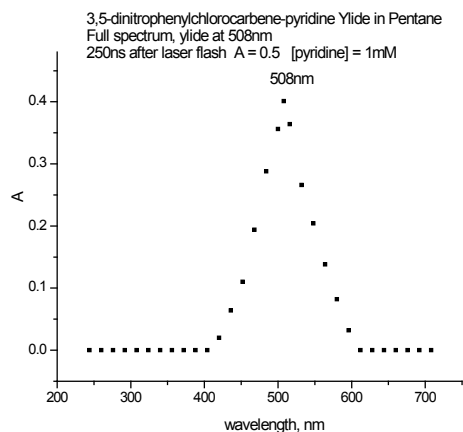

**Figure S-39.** LFP-UV-vis spectrum of pyridinium ylide of 3,5-DN-PhCCl in pentane. Ylide absorption at 508 nm.

#### Additions to tetramethylethylene

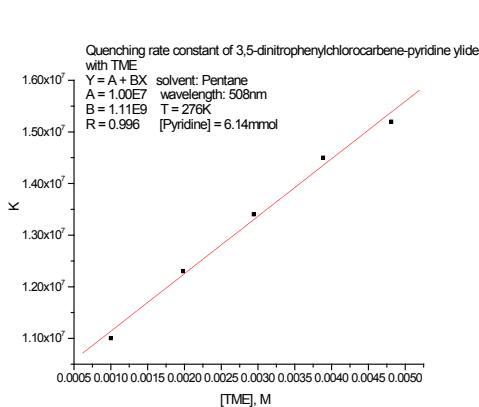

**Figure S-40.** Rate constant for addition of 3,5-DN-PhCCl to TME at 276 K:  $k = 1.11 \exp 9 \text{ M}^{-1} \text{ s}^{-1}$ ,  $r = 0.996$ .

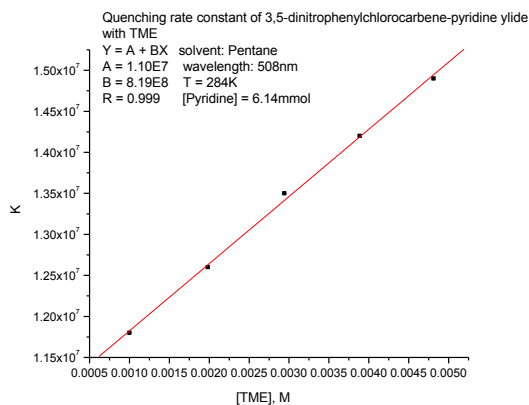

**Figure S-41.** Rate constant for addition of 3,5-DN-PhCCl to TME at 284 K:  $k = 8.19 \exp 8 \text{ M}^{-1} \text{ s}^{-1}$ ,  $r = 0.999$ .

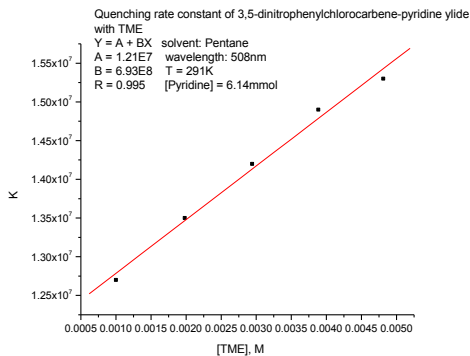

**Figure S-42.** Rate constant for addition of 3,5-DN-PhCCl to TME at 291 K:  $k = 6.93 \exp 8 \text{ M}^{-1} \text{ s}^{-1}$ ,  $r = 0.995$ .

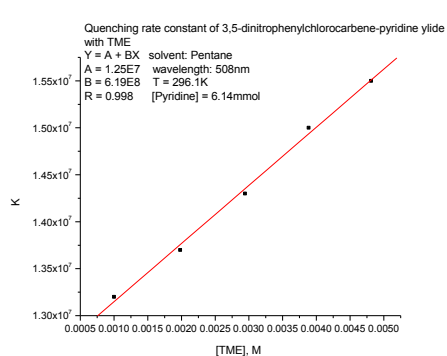

**Figure S-43.** Rate constant for addition of 3,5-DN-PhCCl to TME at 296 K:  $k = 6.19 \exp 8 \text{ M}^{-1} \text{ s}^{-1}$ ,  $r = 0.998$ .

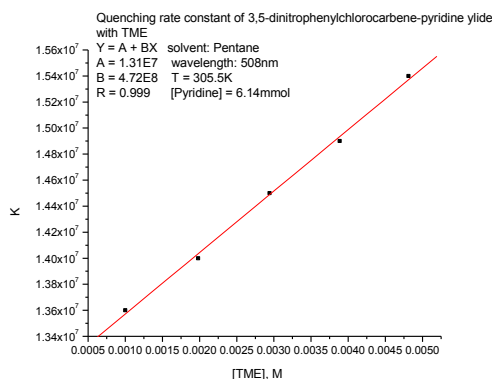

**Figure S-44.** Rate constant for addition of 3,5-DN-PhCCl to TME at 305.5 K:  $k = 4.72 \exp 8 \text{ M}^{-1} \text{ s}^{-1}$ ,  $r = 0.999$ .

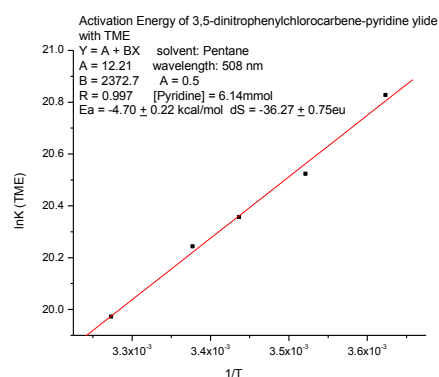

**Figure S-45.** Activation energy, addition of 3,5-DN-PhCCl to TME:  $E_a = -4.70 \pm 0.22 \text{ kcal/mol}$ ,  $\log A = 5.30 \text{ s}^{-1}$ ,  $\Delta S^\ddagger = -36 \pm 0.8 \text{ e.u.}$ ,  $r = 0.997$ .

### Additions to cyclohexene

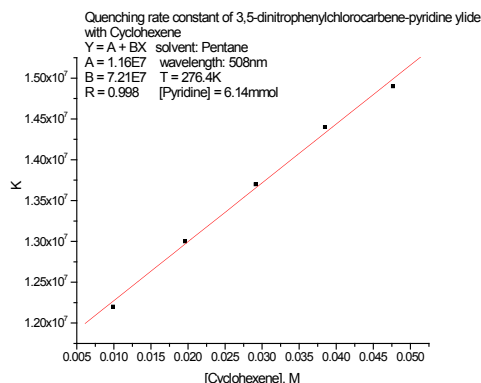

**Figure S-46.** Rate constant for addition of 3,5-DN-PhCCl to cyclohexene at 276 K:  $k = 7.21 \exp 7 \text{ M}^{-1} \text{ s}^{-1}$ ,  $r = 0.998$ .

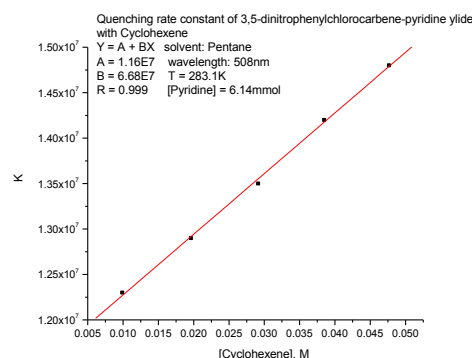

**Figure S-47.** Rate constant for addition of 3,5-DN-PhCCl to cyclohex. at 283 K:  $k = 6.68 \exp 7 \text{ M}^{-1} \text{ s}^{-1}$ ,  $r = 0.999$ .

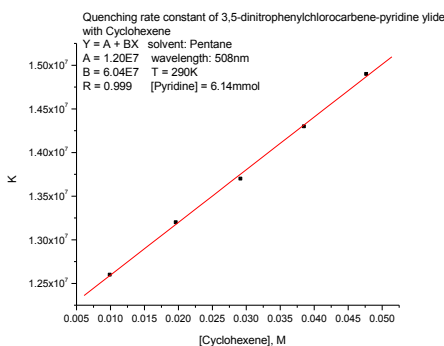

**Figure S-48.** Rate constant for addition of 3,5-DN-PhCCl to cyclohex. at 290 K:  $k = 6.04 \exp 7 \text{ M}^{-1} \text{ s}^{-1}$ ,  $r = 0.999$ .

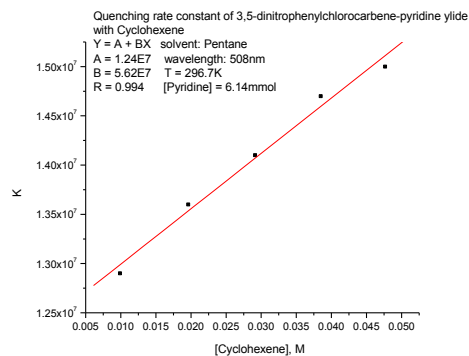

**Figure S-49.** Rate constant for addition of 3,5-DN-PhCCl to cyclohex. at 297 K:  $k = 5.62 \exp 7 \text{ M}^{-1} \text{ s}^{-1}$ ,  $r = 0.994$ .

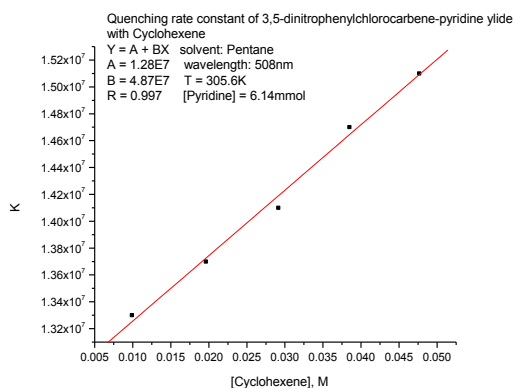

**Figure S-50.** Rate constant for addition of 3,5-DN-PhCCl to cyclohex. at 306 K:  $k = 4.87 \exp 7 \text{ M}^{-1} \text{ s}^{-1}$ ,  $r = 0.997$ .

*Additions to 1-hexene*

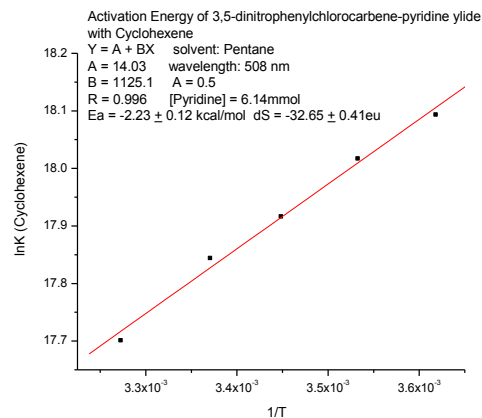

**Figure S-51.** Activation energy, addition of 3,5-DN-PhCCl to cyclohex.:  $E_a = -2.23 \pm 0.12 \text{ kcal/mol}$ ,  $\log A = 6.09 \text{ s}^{-1}$ ,  $\Delta S^\ddagger = -33 \pm 0.4 \text{ e.u.}$ ,  $r = 0.996$ .

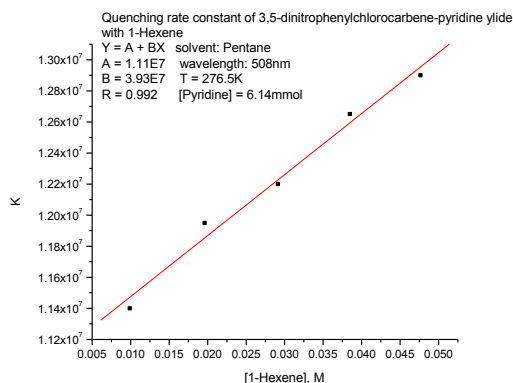

**Figure S-52.** Rate constant for addition of 3,5-DN-PhCCl to 1-hexene at 276.5 K:  $k = 3.93 \exp 7 \text{ M}^{-1} \text{ s}^{-1}$ ,  $r = 0.992$ .

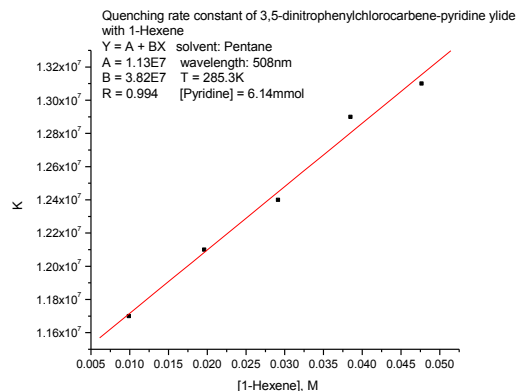

**Figure S-53.** Rate constant for addition of 3,5-DN-PhCCl to 1-hexene at 285 K:  $k = 3.82 \exp 7 \text{ M}^{-1} \text{ s}^{-1}$ ,  $r = 0.994$ .

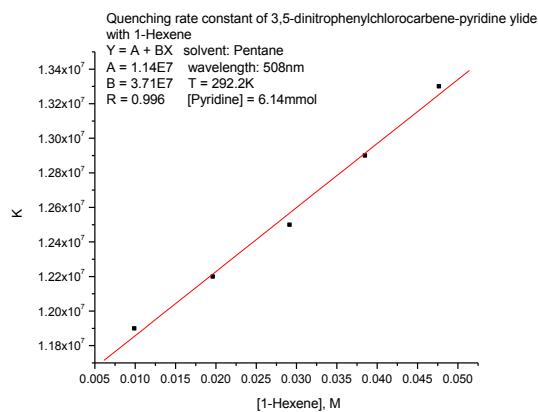

**Figure S-54.** Rate constant for addition of 3,5-DN-PhCCl to 1-hexene at 292 K:  $k = 3.71 \exp 7 \text{ M}^{-1} \text{ s}^{-1}$ ,  $r = 0.996$ .

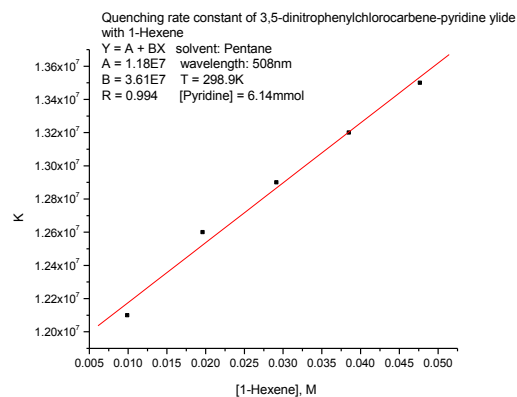

**Figure S-55.** Rate constant for addition of 3,5-DN-PhCCl to 1-hexene at 299 K:  $k = 3.61 \exp 7 \text{ M}^{-1} \text{ s}^{-1}$ ,  $r = 0.994$ .

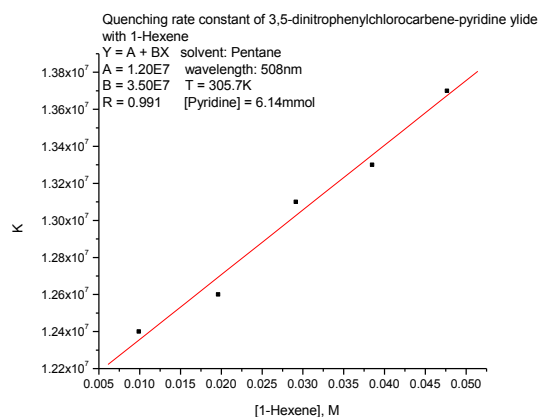

**Figure S-56.** Rate constant for addition of 3,5-DN-PhCCl to 1-hexene at 306 K:  $k = 3.50 \exp 7 \text{ M}^{-1} \text{ s}^{-1}$ ,  $r = 0.991$

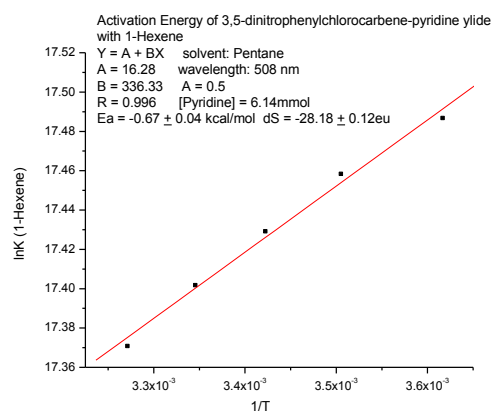

**Figure S-57.** Activation energy, addition of 3,5-DN-PhCCl to 1-hexene:  $E_a = -0.67 \pm 0.04 \text{ kcal/mol}$ ,  $\log A = 7.07 \text{ s}^{-1}$ ,  $\Delta S^\ddagger = -28 \pm 0.4 \text{ e.u.}$ ,  $r = 0.996$ .

## 4. NMR Spectra

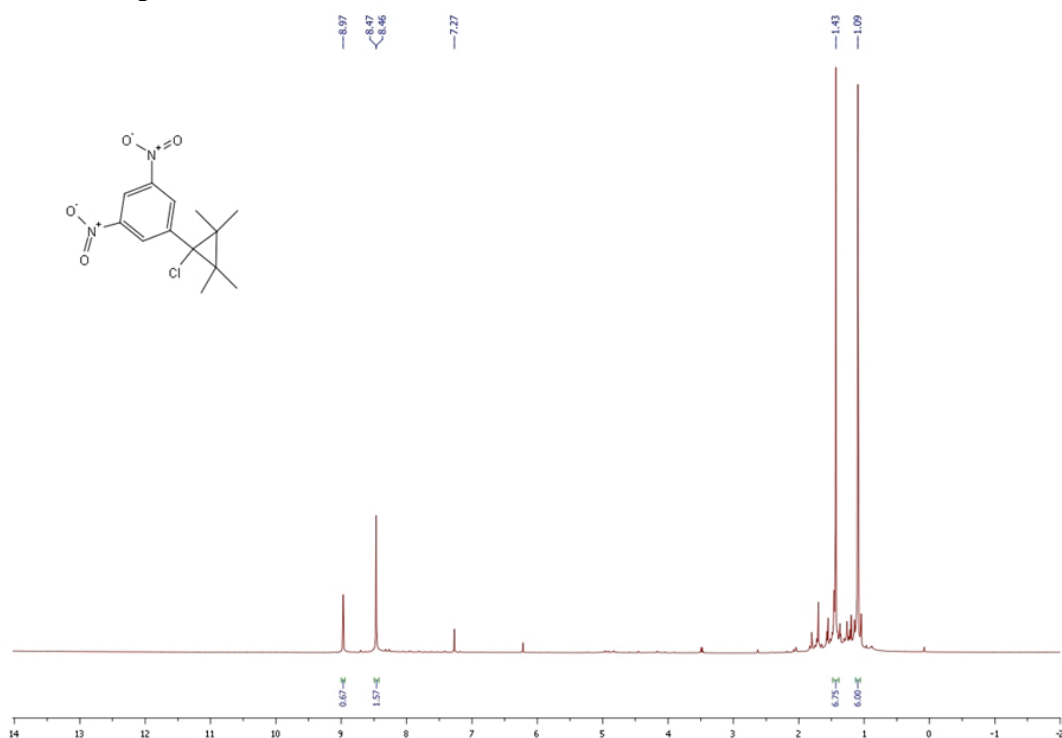

**Figure S-58.** <sup>1</sup>H NMR spectrum of 1-chloro-1-(3,5-dinitrophenyl)-2,2,3,3-tetramethylcyclopropane.

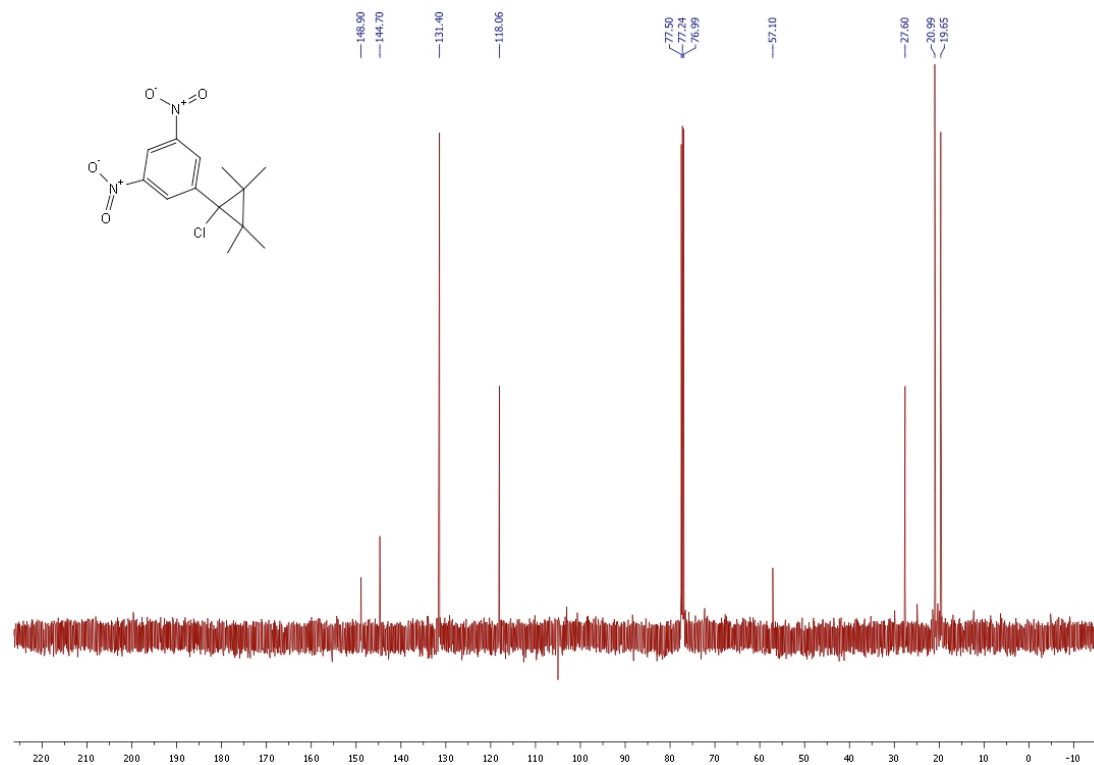

**Figure S-59.** <sup>13</sup>C NMR spectrum of 1-chloro-1-(3,5-dinitrophenyl)-2,2,3,3-tetramethylcyclopropane.

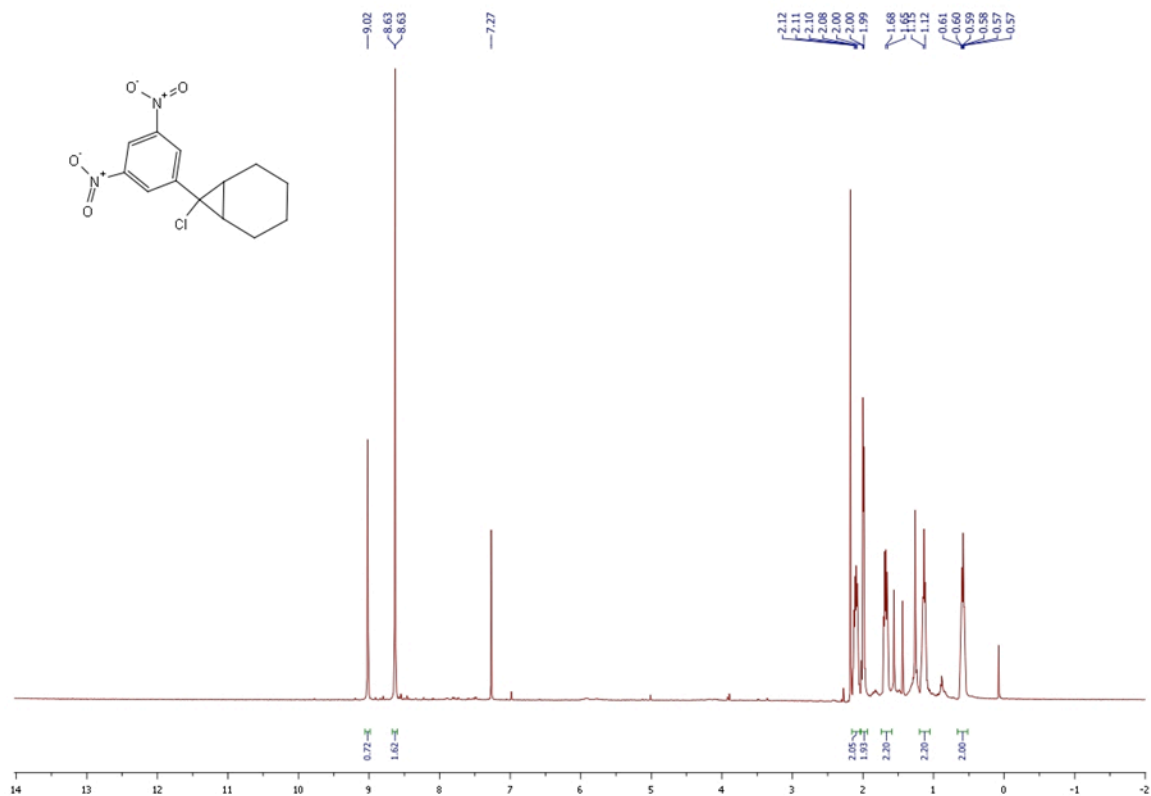

**Figure S-60.** <sup>1</sup>H NMR spectrum of *exo*- or *endo*-7-chloro-7-(3,5-dinitrophenyl)norcarane.

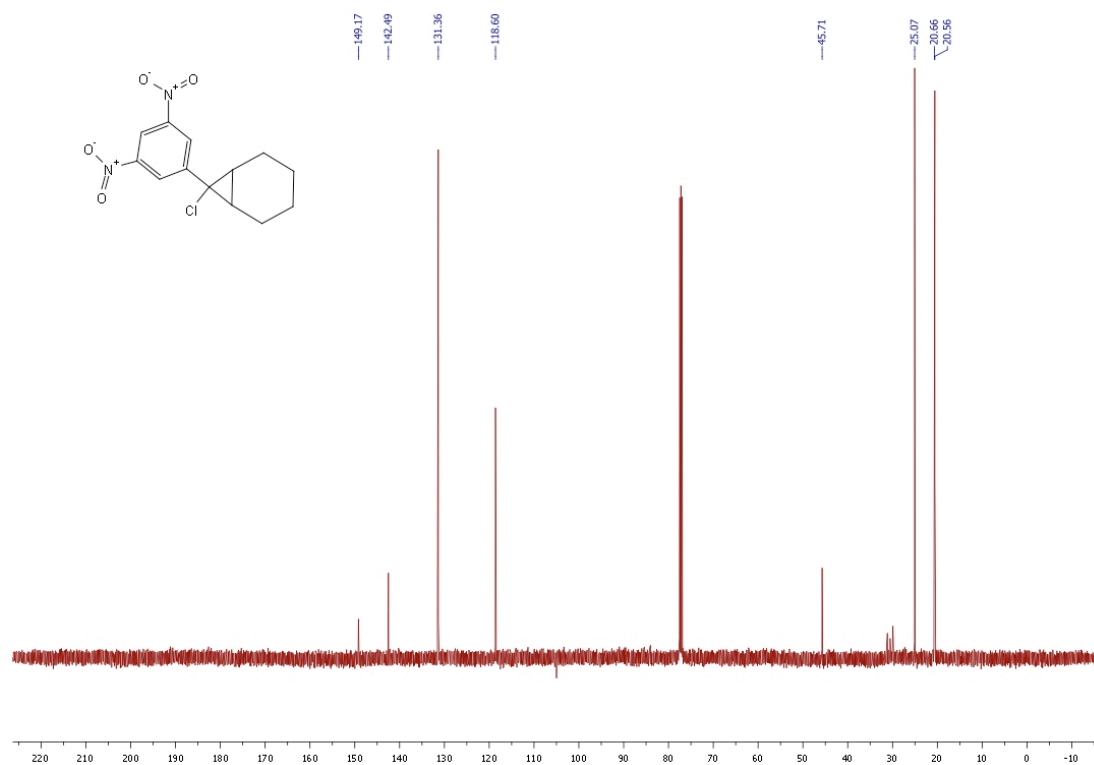

**Figure S-61.** <sup>13</sup>C NMR spectrum of *exo*- or *endo*-7-chloro-7-(3,5-dinitrophenyl)norcarane.



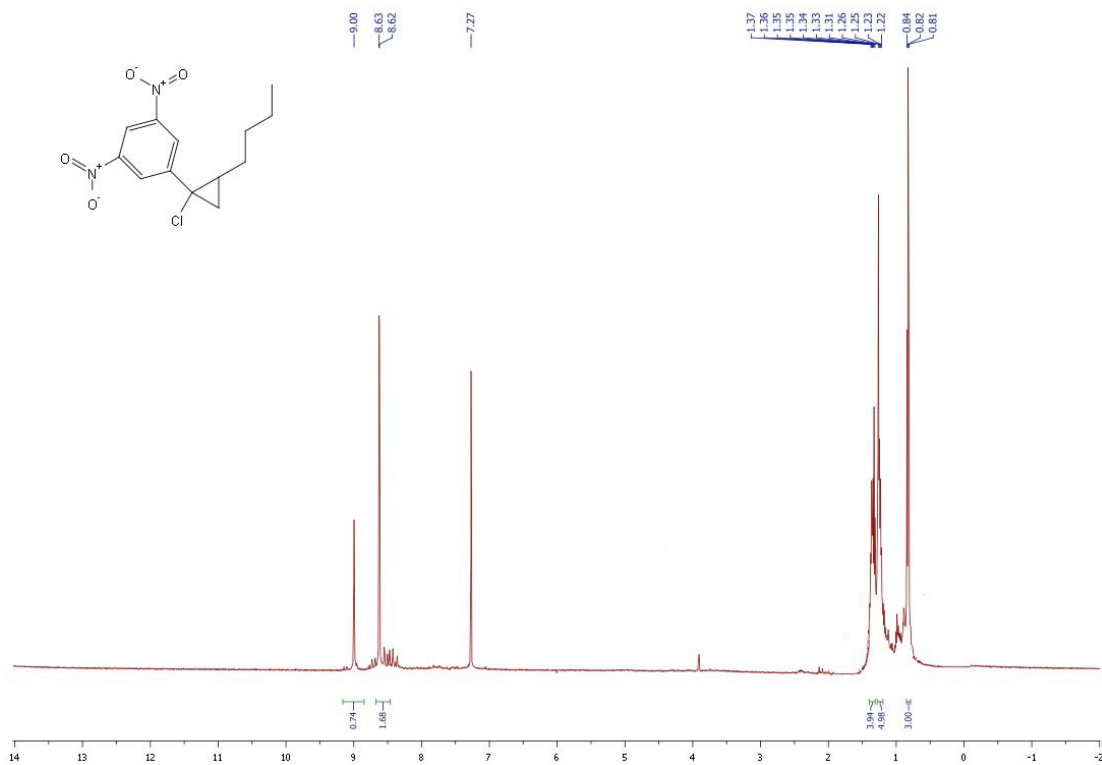

**Figure S-62.** <sup>1</sup>H NMR spectrum of *cis- or trans*-1-chloro-1-(3,5-dinitrophenyl)-2-butylcyclopropane.

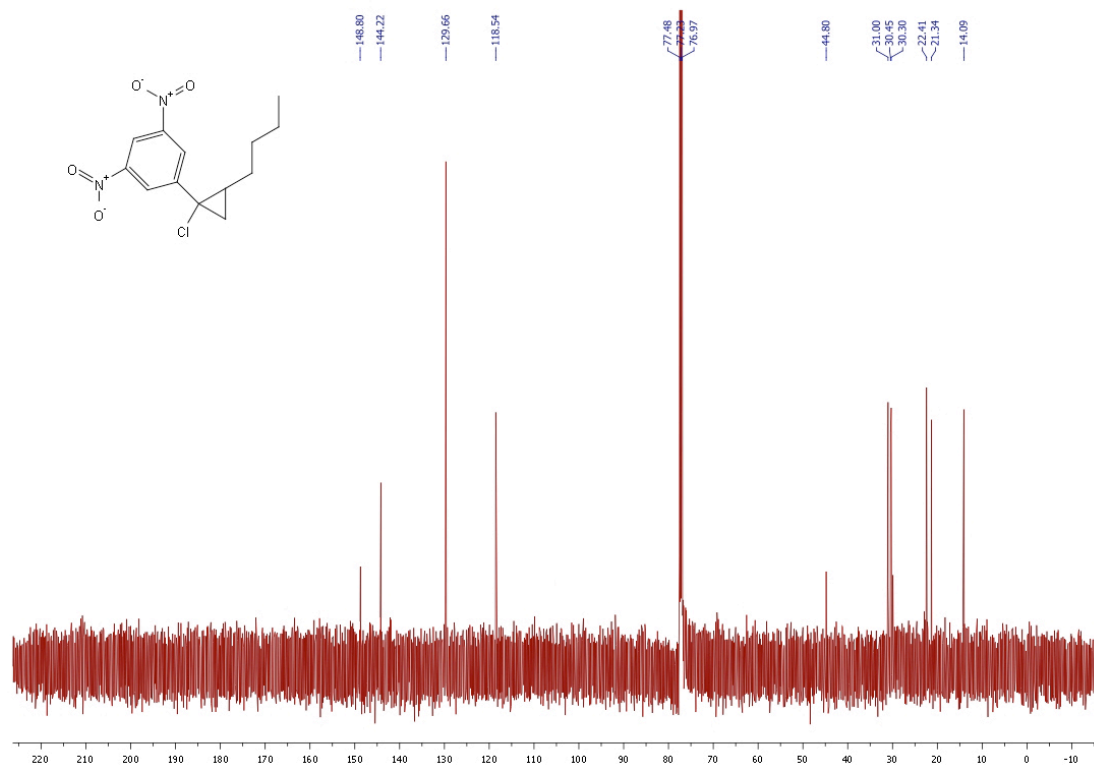

**Figure S-63.** <sup>13</sup>C NMR spectrum of *cis- or trans*-1-chloro-1-(3,5-dinitrophenyl)-2-butylcyclopropane.

**5. MP2/cc-pVTZ Optimized geometries and absolute energies for the lowest singlet and triplet states of PhCCl, F<sub>5</sub>-PhCCl, and 3,5-DN-PhCCl.  
CCSD(T)/cc-pVTZ//MP2/cc-pVTZ absolute energies.**

-----  
PhCCl, singlet, MP2/cc-pVTZ  
-----

0 1

C,0,-2.2910946343,-0.9096259023,0.  
C,0,-0.9637076771,-1.3201508904,0.  
C,0,0.0801408418,-0.3739997621,0.  
C,0,-0.2371188043,0.9991749511,0.  
C,0,-1.5620825288,1.403092713,0.  
C,0,-2.5882696243,0.4519402987,0.  
H,0,-0.6907621014,-2.3664575632,0.  
H,0,0.5606213752,1.7281423639,0.  
H,0,-3.6199490877,0.777915151,0.  
C,0,1.3969205246,-0.9904637545,0.  
H,0,-1.8073788092,2.4561341659,0.  
H,0,-3.088769048,-1.6389371979,0.  
Cl,0,2.6526508334,0.1838219767,0.

|                                              |                             |
|----------------------------------------------|-----------------------------|
| Zero-point correction=                       | 0.095170 (Hartree/Particle) |
| Thermal correction to Energy=                | 0.101847                    |
| Thermal correction to Enthalpy=              | 0.102791                    |
| Thermal correction to Gibbs Free Energy=     | 0.063254                    |
| Sum of electronic and zero-point Energies=   | -728.658780                 |
| Sum of electronic and thermal Energies=      | -728.652103                 |
| Sum of electronic and thermal Enthalpies=    | -728.651158                 |
| Sum of electronic and thermal Free Energies= | -728.690696                 |

CCSD(T)= -0.72886521400D+03

T1 Diagnostic = 0.01467442

Largest amplitude= 7.55D-02

-----  
PhCCl, triplet, MP2/cc-pVTZ  
-----

0 3

C,0,-1.4143329938,-0.7127111798,0.0000002618  
C,0,-0.2924596209,-1.4828077016,0.0000001016  
C,0,0.9699246353,-0.8873624493,0.0000000192  
C,0,1.0558591787,0.5041876639,0.0000001232  
C,0,-0.0795322928,1.2602744253,0.0000002958  
C,0,-1.3206738779,0.6643164721,0.0000003428  
H,0,-0.3662894076,-2.560512138,0.0000000268  
H,0,2.0278487487,0.9748778236,0.0000000763  
H,0,-2.2146569603,1.269827407,0.0000004631  
C,0,2.1255268875,-1.7052127931,-0.0000001379

Cl,0,3.7382486119,-1.2774529794,-0.0000002503  
H,0,0.0005238874,2.3379811336,0.0000003658  
H,0,-2.3855865762,-1.1862338242,0.0000003031

Zero-point correction= 0.097865 (Hartree/Particle)  
Thermal correction to Energy= 0.104206  
Thermal correction to Enthalpy= 0.105150  
Thermal correction to Gibbs Free Energy= 0.065417  
Sum of electronic and zero-point Energies= -728.609500  
Sum of electronic and thermal Energies= -728.603160  
Sum of electronic and thermal Enthalpies= -728.602216  
Sum of electronic and thermal Free Energies= -728.641949

CCSD(T)= -0.72884798801D+03  
T1 Diagnostic = 0.03494237  
Largest amplitude= 1.40D-01

-----  
F5-PhCCl, singlet, MP2/cc-pVTZ  
-----

0 1  
C,0,-1.6368019599,-0.8991512699,0.  
C,0,-0.3302691325,-1.3622645705,0.  
C,0,0.784438259,-0.4850729292,0.  
C,0,0.4904831665,0.9005372865,0.  
C,0,-0.8115365844,1.3705546277,0.  
C,0,-1.8737470094,0.4700430624,0.  
C,0,2.0521463994,-1.1932489038,0.  
Cl,0,3.4153683739,-0.1803118916,0.  
F,0,1.4469207095,1.8161504437,0.  
F,0,-1.0633231219,2.6726754766,0.  
F,0,-3.1143258146,0.9237557717,0.  
F,0,-2.660240577,-1.741354728,0.  
F,0,-0.1635408986,-2.6710343256,0.

Zero-point correction= 0.054488 (Hartree/Particle)  
Thermal correction to Energy= 0.065600  
Thermal correction to Enthalpy= 0.066544  
Thermal correction to Gibbs Free Energy= 0.016214  
Sum of electronic and zero-point Energies= -1224.297784  
Sum of electronic and thermal Energies= -1224.286672  
Sum of electronic and thermal Enthalpies= -1224.285728  
Sum of electronic and thermal Free Energies= -1224.336058

CCSD(T)= -0.12244795695D+04  
T1 Diagnostic = 0.01501720  
Largest amplitude= 7.54D-02

-----  
F5-PhCCl, triplet, MP2/cc-pVTZ  
-----

0 3

|    |          |          |    |
|----|----------|----------|----|
| C  | -1.61248 | -0.92325 | 0. |
| C  | -0.32006 | -1.33001 | 0. |
| C  | 0.73983  | -0.42482 | 0. |
| C  | 0.40979  | 0.92668  | 0. |
| C  | -0.88504 | 1.34339  | 0. |
| C  | -1.9019  | 0.42249  | 0. |
| C  | 2.05574  | -0.93597 | 0. |
| Cl | 3.54312  | -0.21331 | 0. |
| F  | 1.36995  | 1.84642  | 0. |
| F  | -1.17539 | 2.64023  | 0. |
| F  | -3.16303 | 0.82673  | 0. |
| F  | -2.60544 | -1.80608 | 0. |
| F  | -0.05051 | -2.63138 | 0. |

|                                              |                             |
|----------------------------------------------|-----------------------------|
| Zero-point correction=                       | 0.056587 (Hartree/Particle) |
| Thermal correction to Energy=                | 0.067181                    |
| Thermal correction to Enthalpy=              | 0.068125                    |
| Thermal correction to Gibbs Free Energy=     | 0.018288                    |
| Sum of electronic and zero-point Energies=   | -1224.253385                |
| Sum of electronic and thermal Energies=      | -1224.242790                |
| Sum of electronic and thermal Enthalpies=    | -1224.241846                |
| Sum of electronic and thermal Free Energies= | -1224.291683                |

CCSD(T)= -0.12244679204D+04

T1 Diagnostic = 0.02776907

Largest amplitude= 1.35D-01

-----  
3,5-DN-PhCCl, singlet, MP2/cc-pVTZ  
-----

0 1

|                                |
|--------------------------------|
| C,0,-1.43400506,-0.62014219,0. |
| C,0,-0.36893103,-1.50484015,0. |
| C,0,0.93829795,-0.99531711,0.  |
| C,0,1.1474239,0.3936149,0.     |
| C,0,0.04730488,1.22626486,0.   |
| C,0,-1.25953611,0.75366982,0.  |
| H,0,-0.527322,-2.57268916,0.   |
| H,0,2.14170189,0.81347993,0.   |
| H,0,-2.10091713,1.42802079,0.  |
| N,0,0.25842483,2.69027387,0.   |
| N,0,-2.81246105,-1.15163223,0. |
| O,0,-2.93638101,-2.37084224,0. |

O,0,-0.7435382,3.39680484,0.  
 C,0,1.96340198,-2.05330507,0.  
 Cl,0,3.53207196,-1.40361502,0.  
 O,0,1.41909282,3.08419891,0.  
 O,0,-3.72469507,-0.33235126,0.

|                                              |                             |
|----------------------------------------------|-----------------------------|
| Zero-point correction=                       | 0.099740 (Hartree/Particle) |
| Thermal correction to Energy=                | 0.111763                    |
| Thermal correction to Enthalpy=              | 0.112707                    |
| Thermal correction to Gibbs Free Energy=     | 0.057089                    |
| Sum of electronic and zero-point Energies=   | -1137.077105                |
| Sum of electronic and thermal Energies=      | -1137.065081                |
| Sum of electronic and thermal Enthalpies=    | -1137.064137                |
| Sum of electronic and thermal Free Energies= | -1137.119756                |

CCSD(T)= -0.11373184105D+04  
 T1 Diagnostic = 0.02025759  
 Largest amplitude= 5.61D-02

-----  
 3,5-DN-PhCCl, triplet, MP2/cc-pVTZ  
 -----

0 3  
 C,0,-1.388762,-0.696672,0.  
 C,0,-0.285335,-1.482674,0.  
 C,0,0.976731,-0.890854,0.  
 C,0,1.058171,0.498897,0.  
 C,0,-0.08631,1.231914,0.  
 C,0,-1.333151,0.673373,0.  
 H,0,-0.395486,-2.556232,0.  
 H,0,2.012517,1.002384,0.  
 H,0,-2.225339,1.276851,0.  
 N,0,0.024575,2.708399,0.  
 N,0,-2.718089,-1.34725,0.  
 O,0,-2.743589,-2.572836,-0.  
 O,0,-1.020779,3.346916,-0.  
 C,0,2.132635,-1.70826,0.  
 Cl,0,3.734745,-1.281438,0.  
 O,0,1.153838,3.185735,0.  
 O,0,-3.698422,-0.612433,0.

|                                              |                             |
|----------------------------------------------|-----------------------------|
| Zero-point correction=                       | 0.102718 (Hartree/Particle) |
| Thermal correction to Energy=                | 0.114181                    |
| Thermal correction to Enthalpy=              | 0.115125                    |
| Thermal correction to Gibbs Free Energy=     | 0.061535                    |
| Sum of electronic and zero-point Energies=   | -1137.032651                |
| Sum of electronic and thermal Energies=      | -1137.021188                |
| Sum of electronic and thermal Enthalpies=    | -1137.020244                |
| Sum of electronic and thermal Free Energies= | -1137.073834                |

CCSD(T)= -0.11373052797D+04  
T1 Diagnostic = 0.03070135  
Largest amplitude= 1.26D-01
